# Supplementary material for: Apigenin-7-O-β-D-(-6”-p-coumaroyl)-glucopyranoside treatment elicits a neuroprotective effect through GSK-3β phosphorylation-mediated Nrf2 activation
Source: Aging (Albany NY). 2020 Nov 18;12(23):23872–88. doi: 10.18632/aging.104050 (PMC7762462; doi:10.18632/aging.104050)
Supplement: Supplementary Figure 1 [file aging-12-104050-s001.pdf]

## SUPPLEMENTARY FIGURE

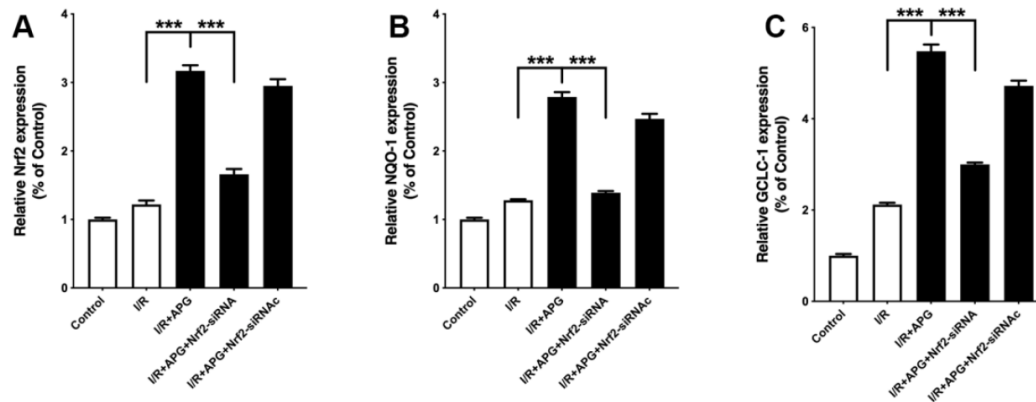

**Supplementary Figure 1. APG treatment increased the mRNA expression of Nrf2 and its downstream signal NQO-1 and GCLC-1, respectively.** (A) Nrf2 mRNA expression, (B) NQO-1 mRNA expression, (C) GCLC-1 mRNA expression at 24 h after reperfusion. \*\*\*  $P < 0.001$  I/R = ischemia/reperfusion.
